# Supplementary material
Source: publisher figshare collection journal article supplement (https://acs.figshare.com/ndownloader/files/8336534)

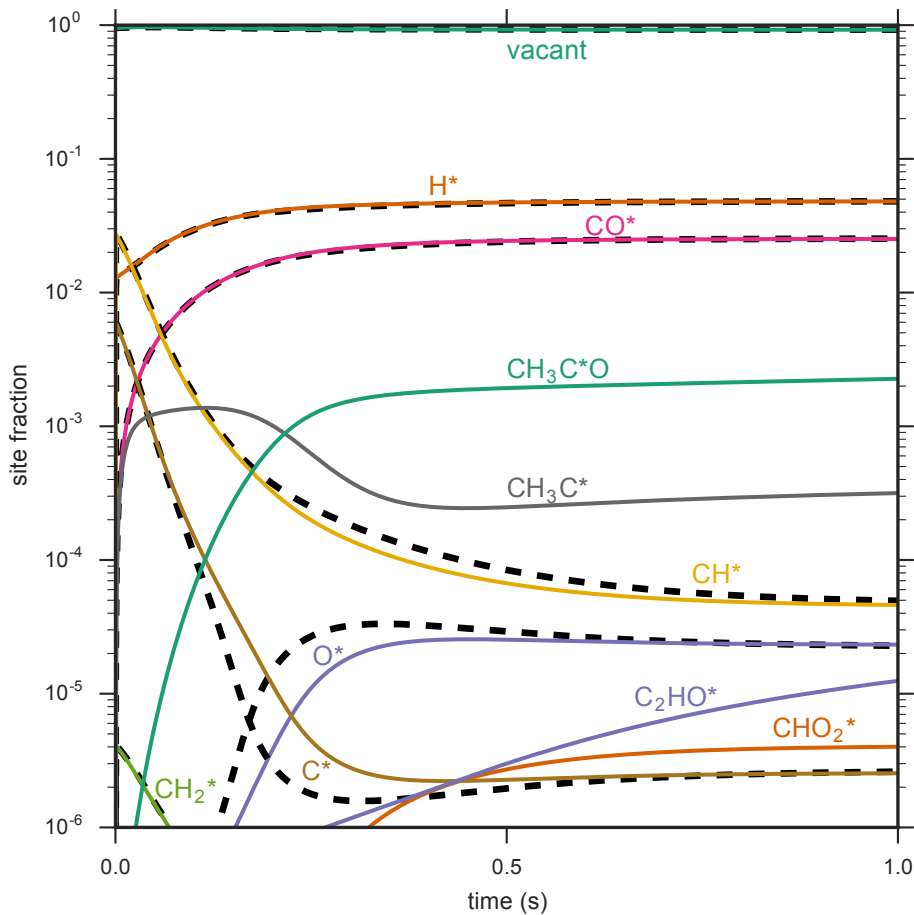

Supplement: Supplementary file 1 [file 8336534]

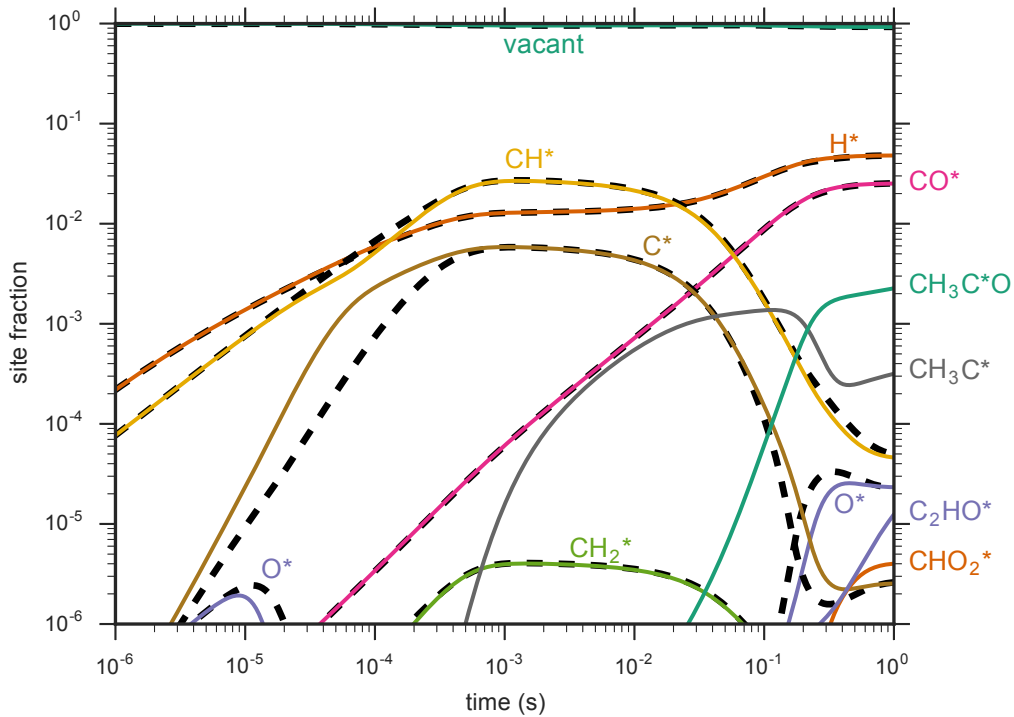

Supplement: Supplementary file 2 [file 8336534]

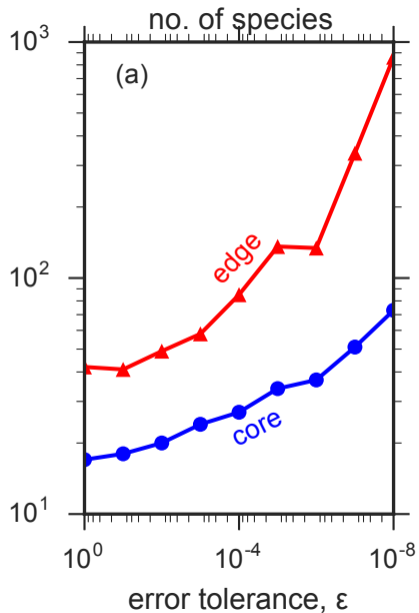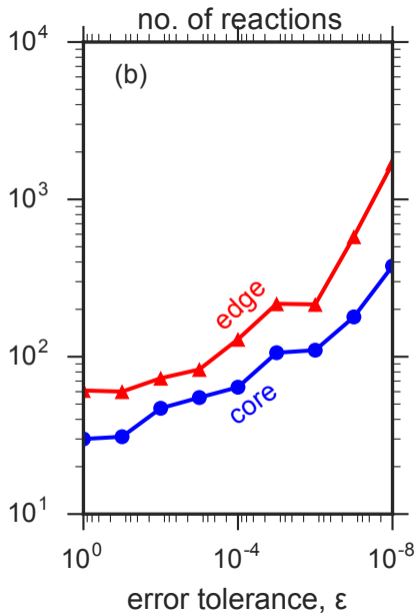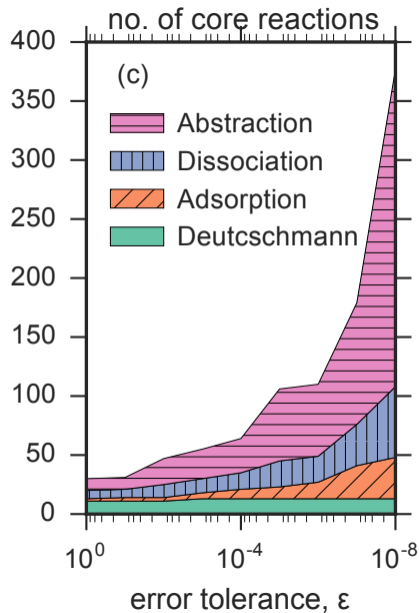

Supplement: Supplementary file 3 [file 8336534]

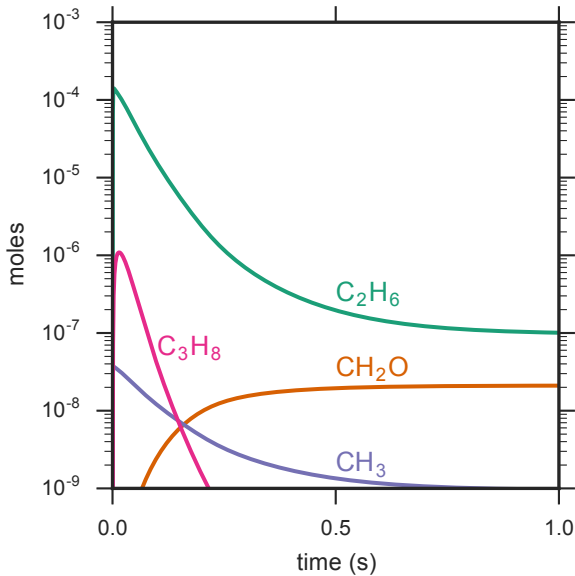

Supplement: Supplementary file 4 [file 8336534]

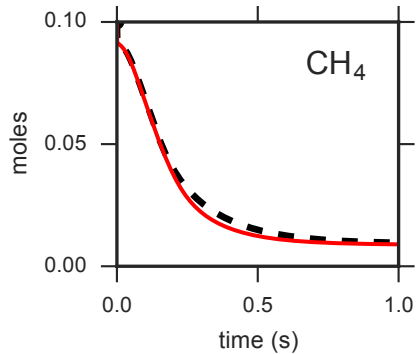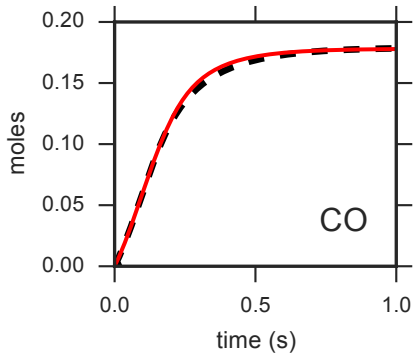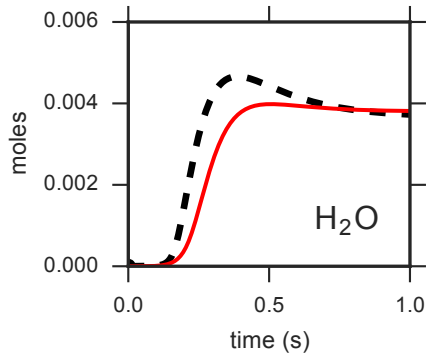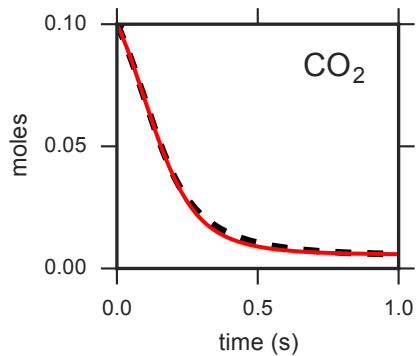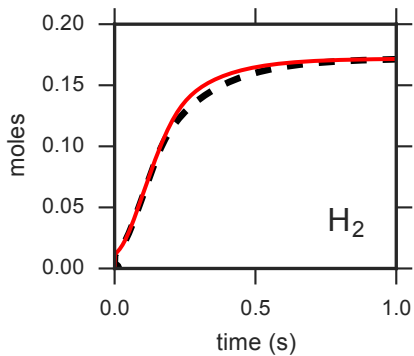

— RMG-Cat  
- - Delgado et al.

Supplement: Supplementary file 5 [file 8336534]
